# Supplementary material for: High performance supercapacitors based on wood-derived thick carbon electrodes synthesized via green activation process
Source: Royal Society of Chemistry journal article supplement (doi:10.1039/d2qi01914k), 2022-01-01
Supplement: d2qi01914k1.pdf [file d2qi01914k1.pdf]

## High performance supercapacitors based on wood-derived thick carbon electrodes synthesized via green activation process

Bing Yan<sup>a</sup>, Li Feng<sup>a</sup>, Jiaojiao Zheng<sup>a</sup>, Qian Zhang<sup>b, \*</sup>, Shaohua Jiang<sup>a</sup>, Chunmei Zhang<sup>c</sup>, Yichun Ding<sup>d, \*</sup>, Jingquan Han<sup>a</sup>, Wei Chen<sup>e, f, \*</sup>, Shuijian He<sup>a, \*</sup>

<sup>a</sup> *International Innovation Center for Forest Chemicals and Materials, Co-Innovation Center of Efficient Processing and Utilization of Forest Resources, College of Materials Science and Engineering, Nanjing Forestry University, Nanjing, 210037, China.*

<sup>b</sup> *College of Science, Nanjing Forestry University, Nanjing 210037, China.*

<sup>c</sup> *Institute of Materials Science and Devices, School of Materials Science and Engineering, Suzhou University of Science and Technology, Suzhou 215009, China.*

<sup>d</sup> *Fujian Institute of Research on the Structure of Matter, Chinese Academy of Sciences, Fuzhou 350010, China.*

<sup>e</sup> *State Key Laboratory of Electroanalytical Chemistry, Changchun Institute of Applied Chemistry, Chinese Academy of Sciences, Changchun 130022, Jilin, PR China.*

<sup>f</sup> *University of Science and Technology of China, Hefei 230026, PR China.*

\* Corresponding authors

*E-mail:* [zhangqian5689@njfu.edu.cn](mailto:zhangqian5689@njfu.edu.cn) (Qian Zhang); [yceding@fjirsm.ac.cn](mailto:yceding@fjirsm.ac.cn) (Yichun Ding); [weichen@ciac.ac.cn](mailto:weichen@ciac.ac.cn) (Wei Chen); [shuijianhe@njfu.edu.cn](mailto:shuijianhe@njfu.edu.cn) (Shuijian He)

## Details about electrochemical calculations

CV is an effective analysis means for exploring the electrochemical kinetics of electrodes. According to the Duun's method<sup>1</sup>, the relationship between peak current ( $i$ ) with disparate scanning rates ( $v$ ) can be described in the following equations:

$$i = a \times v^b \quad (1)$$

$$\log i = b \times \log v + \log a \quad (2)$$

The  $b$  value depended on the slope of the  $\log i$  with respect to  $\log v$ , the  $b$  value of 0.5 is indicative of a diffusion-controlled process, while  $b = 1$  represents a fast capacitive process.

By separating the total current response ( $i$ ) at a given voltage, the contribution can be quantitatively separated into capacitive-controlled process and diffusion-controlled process according to the following equation:

$$i = k_1 v + k_2 v^{1/2} \quad (3)$$

Where the  $k_1 v$  and  $k_2 v^{1/2}$  correspond to capacitive- and diffusion-controlled contribution, respectively.

In three-electrode system, the areal specific capacitances ( $C_s$ , mF cm<sup>-2</sup>) and gravimetric specific capacitances ( $C_g$ , F g<sup>-1</sup>) of a single electrode was calculated from GCD curves according to equations (4) and (5), respectively. The volumetric specific capacitances ( $CV$ , F cm<sup>-3</sup>) of single electrode was calculated from  $C_s$  by the formula (6).

$$C_s = \frac{I\Delta t}{s\Delta V} \quad (4)$$

$$C_g = \frac{I\Delta t}{m\Delta V} \quad (5)$$

$$CV = \frac{C_s}{d} \quad (6)$$

Where  $I$  (A),  $\Delta t$  (s),  $s$  (cm<sup>2</sup>),  $d$  (cm),  $m$  (g),  $\Delta V$  (V) represents the discharge current, galvanostatic discharge time, the geometry area, thickness and mass of working electrode, the potential window of the discharge process,

respectively.

In two-electrode system, the  $C'_s$  (mF cm<sup>-2</sup>),  $C'_g$  (F g<sup>-1</sup>) and  $C'_V$  (F cm<sup>-3</sup>) were calculated from GCD curves by the equations (7) to (9).

$$C'_s = \frac{2 \times I \times \Delta t}{s \times \Delta V} \quad (7)$$

$$C'_g = \frac{2 \times I \times \Delta t}{m \times \Delta V} \quad (8)$$

$$C'_V = \frac{C'_s}{d} \quad (9)$$

The areal energy density ( $E_s$ , mWh cm<sup>-2</sup>), areal power density ( $P_s$ , mW cm<sup>-2</sup>), gravimetric energy density ( $E_g$ , Wh kg<sup>-1</sup>), gravimetric power density ( $P_g$ , W kg<sup>-1</sup>), volumetric energy density (mWh cm<sup>-3</sup>) and volumetric power density (mW cm<sup>-3</sup>) was based on the calculated capacitance values and evaluated according to the following equation:

$$E_s = \frac{C'_s \times \Delta V^2}{7200} \quad (10)$$

$$P_s = \frac{3600 \times E_s}{\Delta t} \quad (11)$$

$$E_g = \frac{C'_g \times \Delta V^2}{7.2} \quad (12)$$

$$P_g = \frac{3600 \times E_g}{\Delta t} \quad (13)$$

$$EV = \frac{E_s}{d} \quad (14)$$

$$PV = \frac{P_s}{d} \quad (15)$$

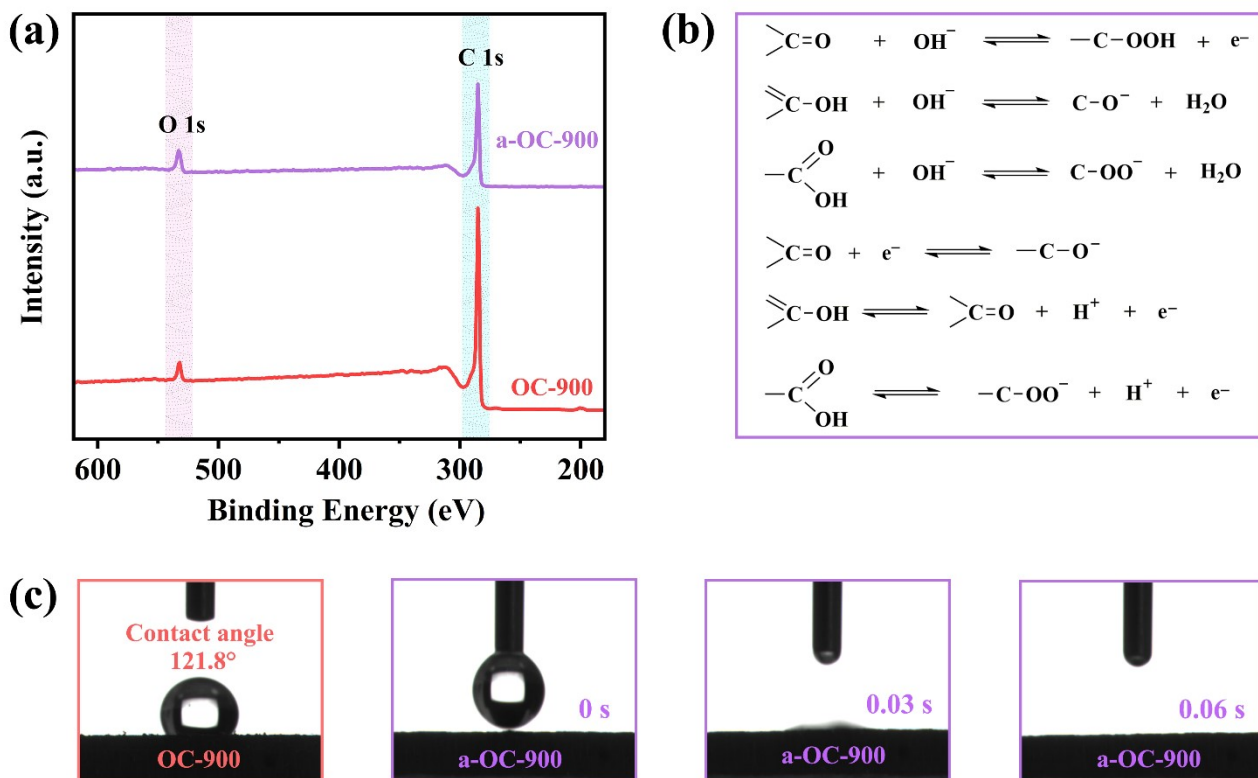

**Fig. S1.** (a) XPS survey spectra of OC-900 and a-OC-900. (b) Faradaic redox reactions involved in the alkaline/acidic electrolyte. (c) Water contact angle measurement of OC-900 (red) and a-OC-900 (purple).

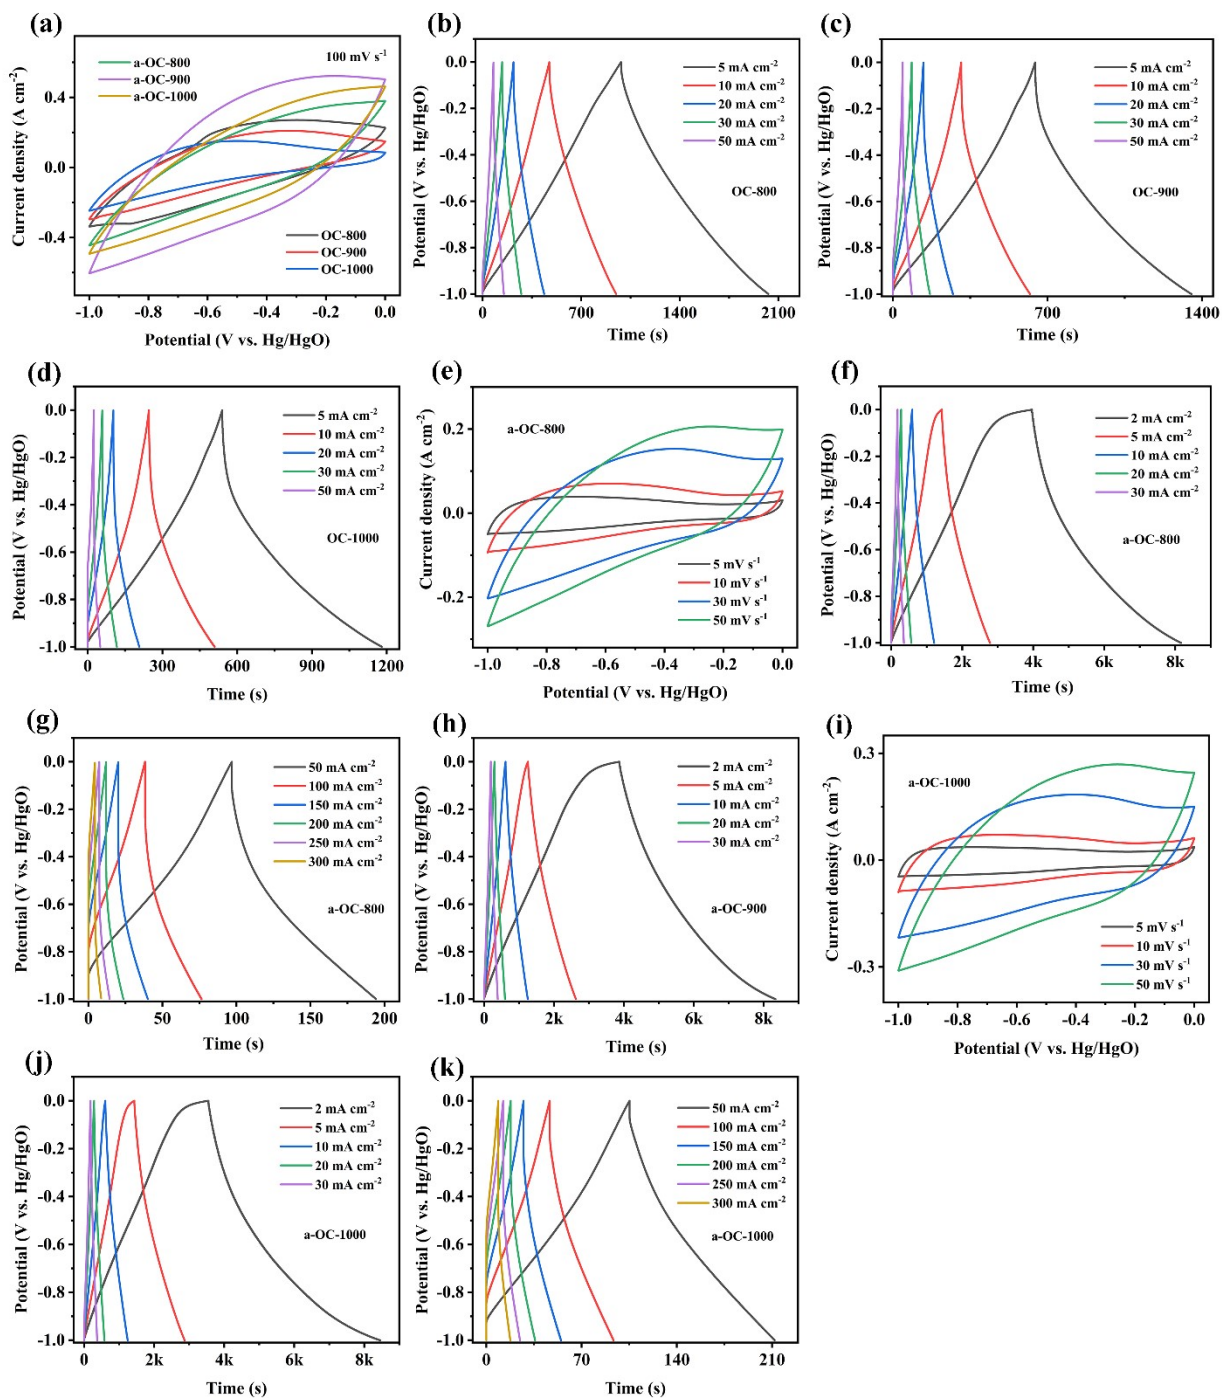

**Fig. S2.** Capacitive properties of electrodes in three-electrode system with 6 M KOH electrolyte. (a) The comparison of CV curves of OC-X and activated samples at  $100 \text{ mV s}^{-1}$ . The GCD profiles of (b) OC-800, (c) OC-900 and (d) OC-1000, respectively. (e) CV curves and (f, g) GCD profiles of a-OC-800. (h) GCD profiles of a-OC-900. (i) CV curves and (j, k) GCD profiles of a-OC-1000.

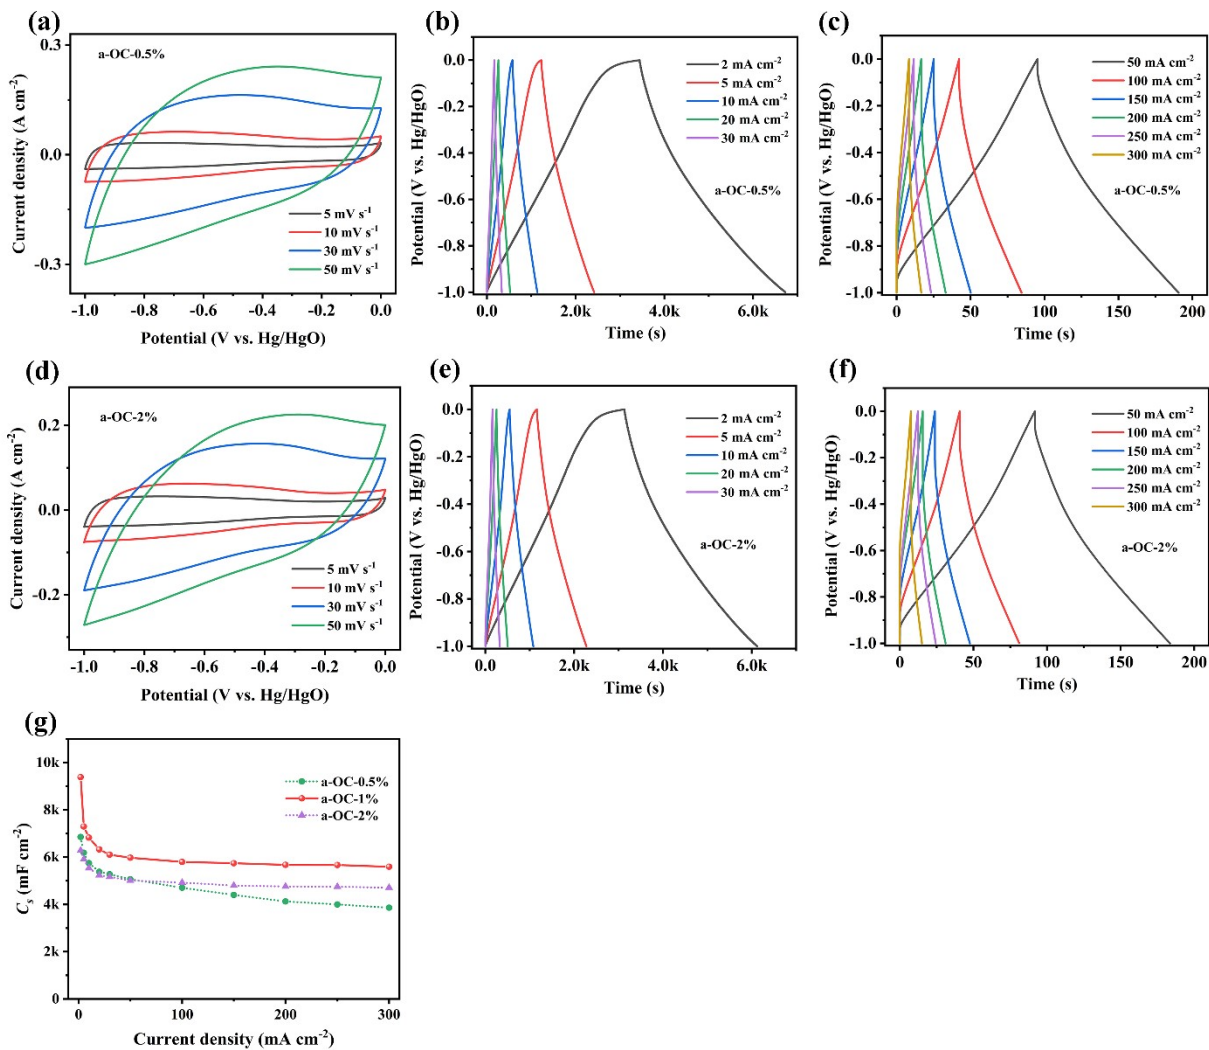

**Fig. S3.** Capacitive properties of concentration series samples in three-electrode system with 6 M KOH electrolyte. (a) CV curves and (b, c) GCD profiles of a-OC-0.5%. (d) CV curves and (e, f) GCD profiles of a-OC-2%. (g) Rate performance of concentration series samples.

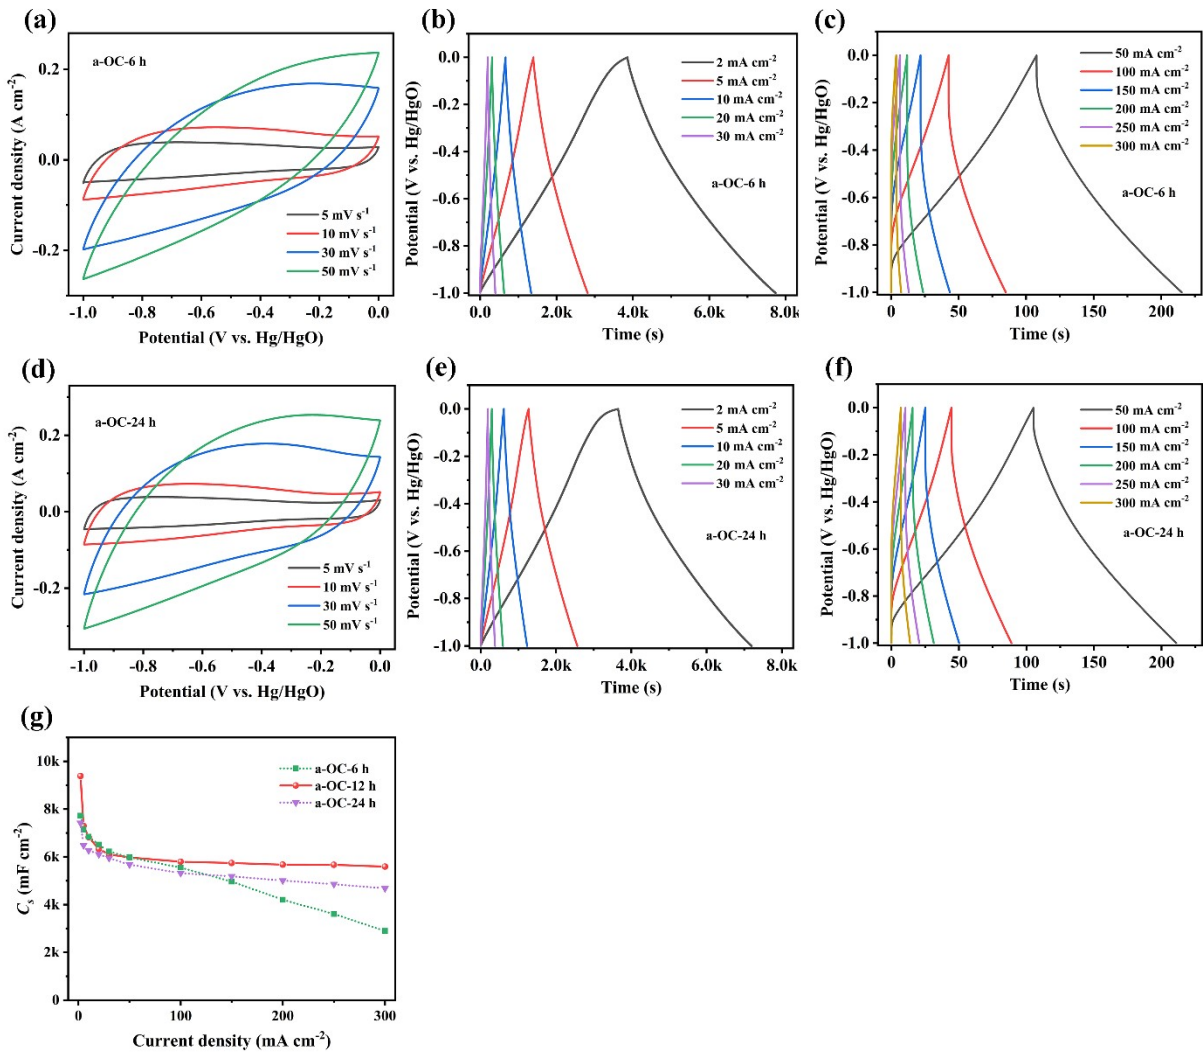

**Fig. S4.** Capacitive properties of activation time series samples in three-electrode system with 6 M KOH electrolyte. (a) CV curves and (b, c) GCD profiles of a-OC-6 h. (d) CV curves and (e, f) GCD profiles of a-OC-24 h. (g) Rate performance of activation time series samples.

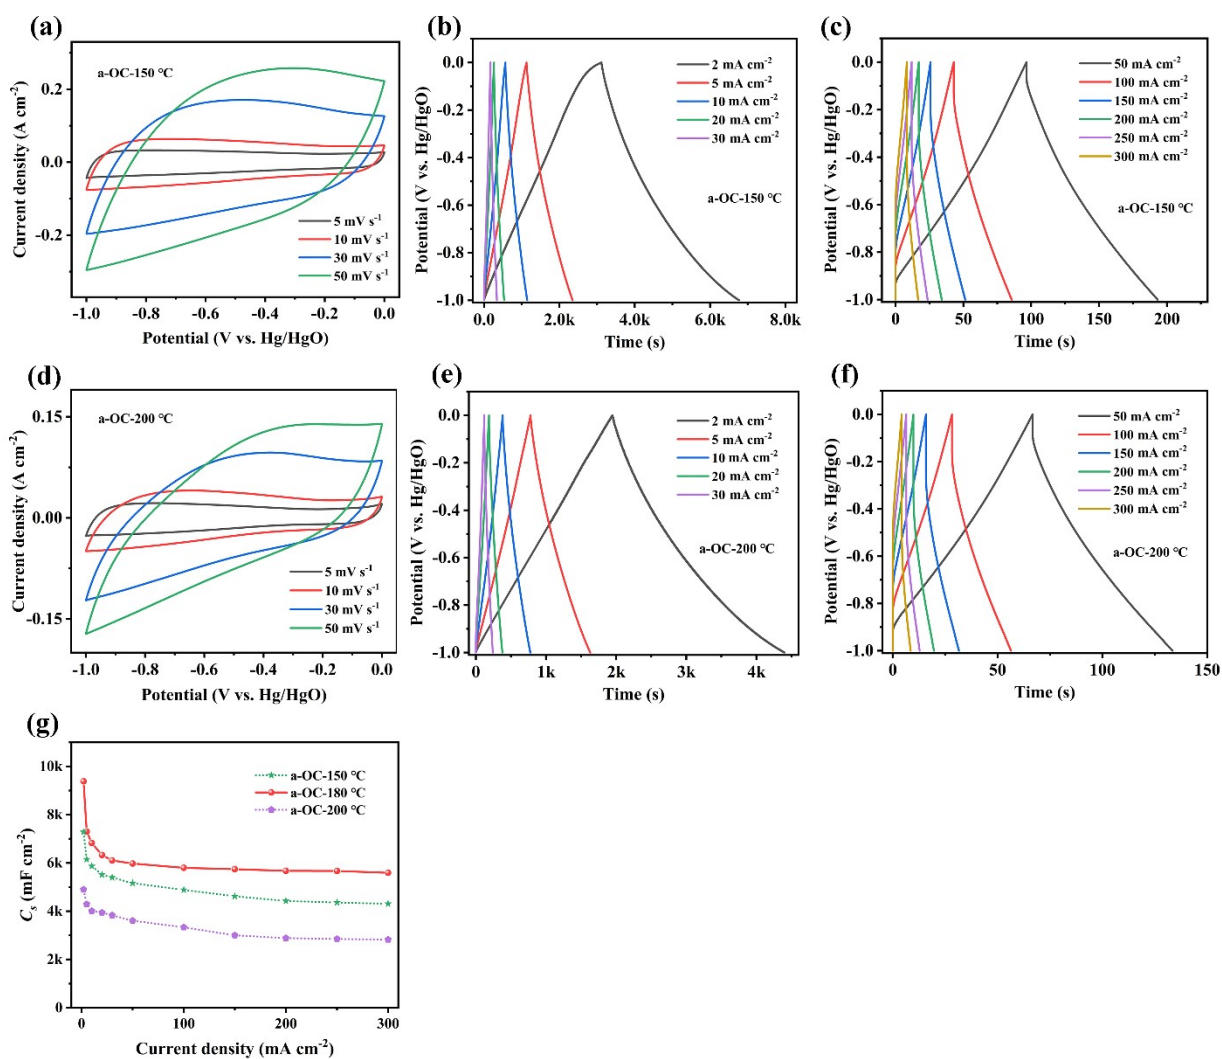

**Fig. S5.** Capacitive properties of activation temperature series samples in three-electrode system with 6 M KOH electrolyte. (a) CV curves and (b, c) GCD profiles of a-OC-150 °C. (d) CV curves and (e, f) GCD profiles of a-OC-200 °C. (g) Rate performance of activation temperature series samples.



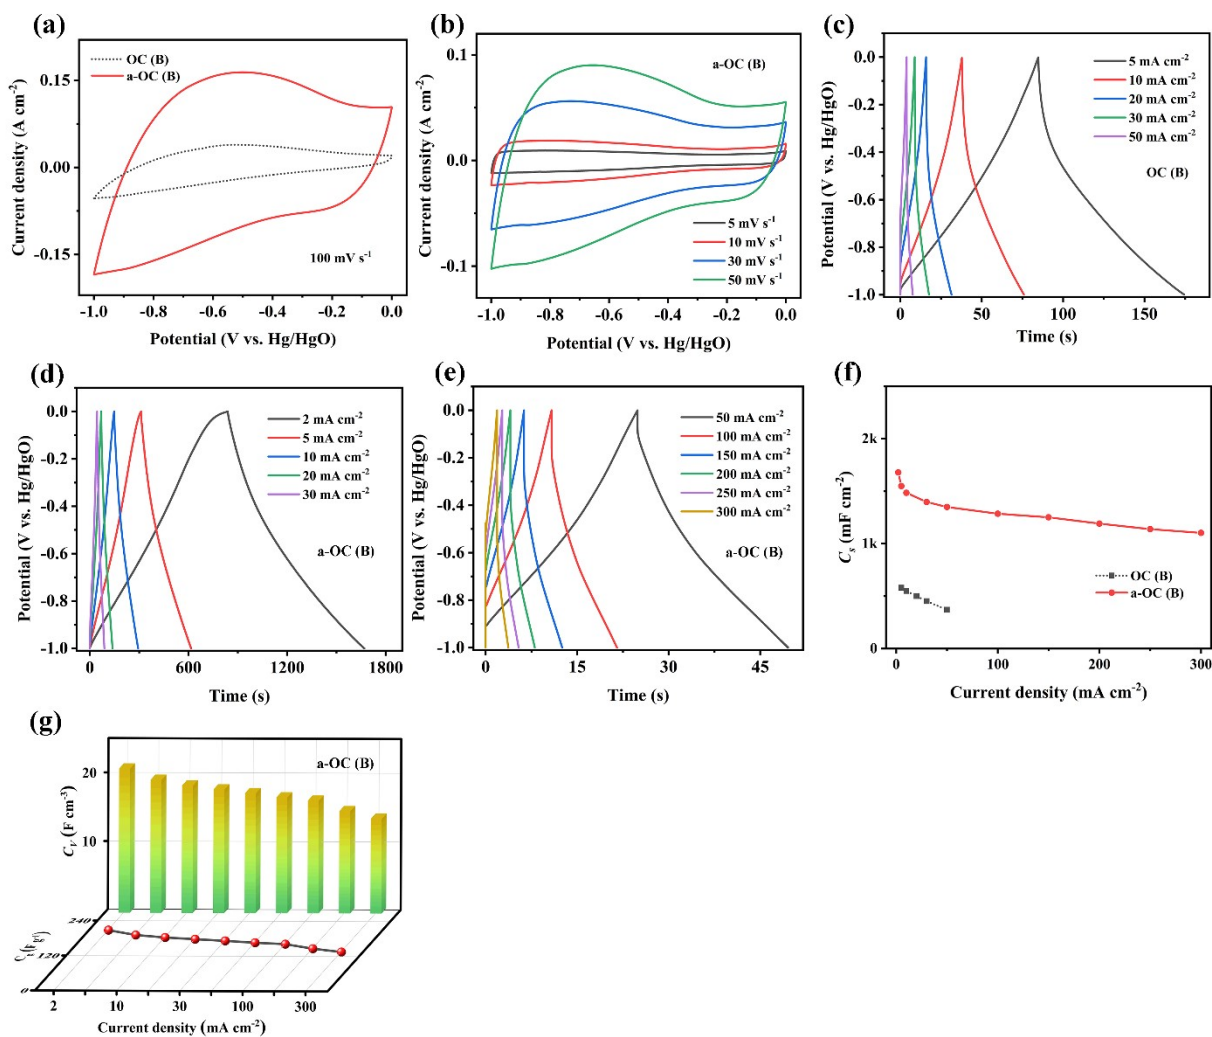

**Fig. S6.** Capacitive properties of electrodes in three-electrode system with 6 M KOH electrolyte. (a) The comparison of CV curves of OC (B) and a-OC (B) at  $100 \text{ mV s}^{-1}$ . (b) CV curves of a-OC (B). GCD profiles of (c) OC (B) and (d, e) a-OC (B). (f) Rate performance of OC (B) and a-OC (B). (g) Comparison of  $C_g$  and  $C_v$  versus different current densities of a-OC (B).

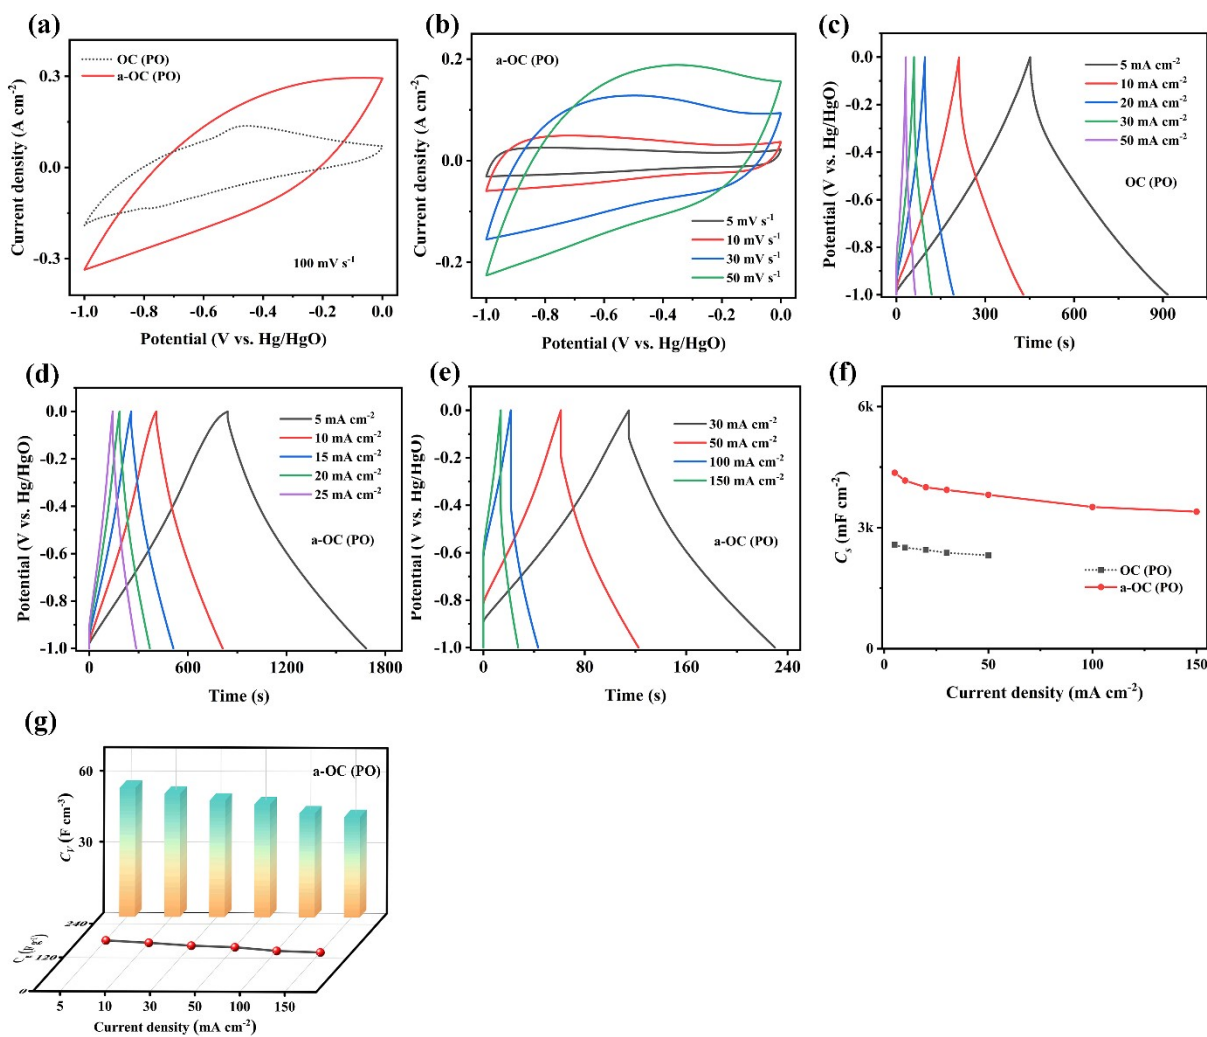

**Fig. S7.** Capacitive properties of electrodes in three-electrode system with 6 M KOH electrolyte. (a) The comparison of CV curves of OC (PO) and a-OC (PO) at 100 mV s<sup>-1</sup>. (b) CV curves of a-OC (PO). GCD profiles of (c) OC (PO) and (d, e) a-OC (PO). (f) Rate performance of OC (PO) and a-OC (PO). (g) Comparison of  $C_g$  and  $C_v$  versus different current densities of a-OC (PO).

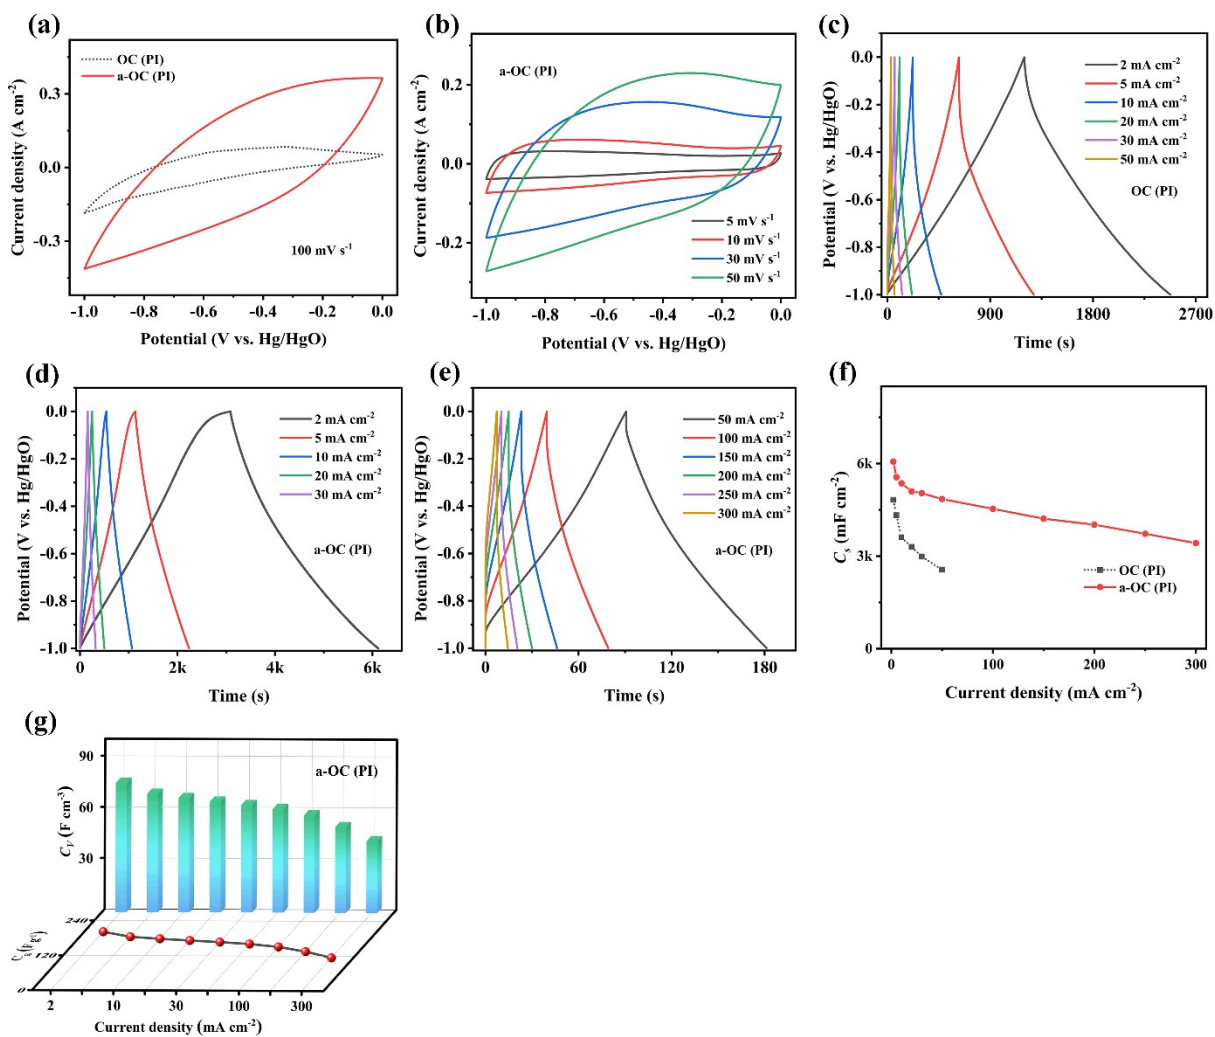

**Fig. S8.** Capacitive properties of electrodes in three-electrode system with 6 M KOH electrolyte. (a) The comparison of CV curves of OC (PI) and a-OC (PI) at 100 mV s<sup>-1</sup>. (b) CV curves of a-OC (PI). GCD profiles of (c) OC (PI) and (d, e) a-OC (PI). (f) Rate performance of OC (PI) and a-OC (PI). (g) Comparison of C<sub>g</sub> and C<sub>v</sub> versus different current densities of a-OC (PI).

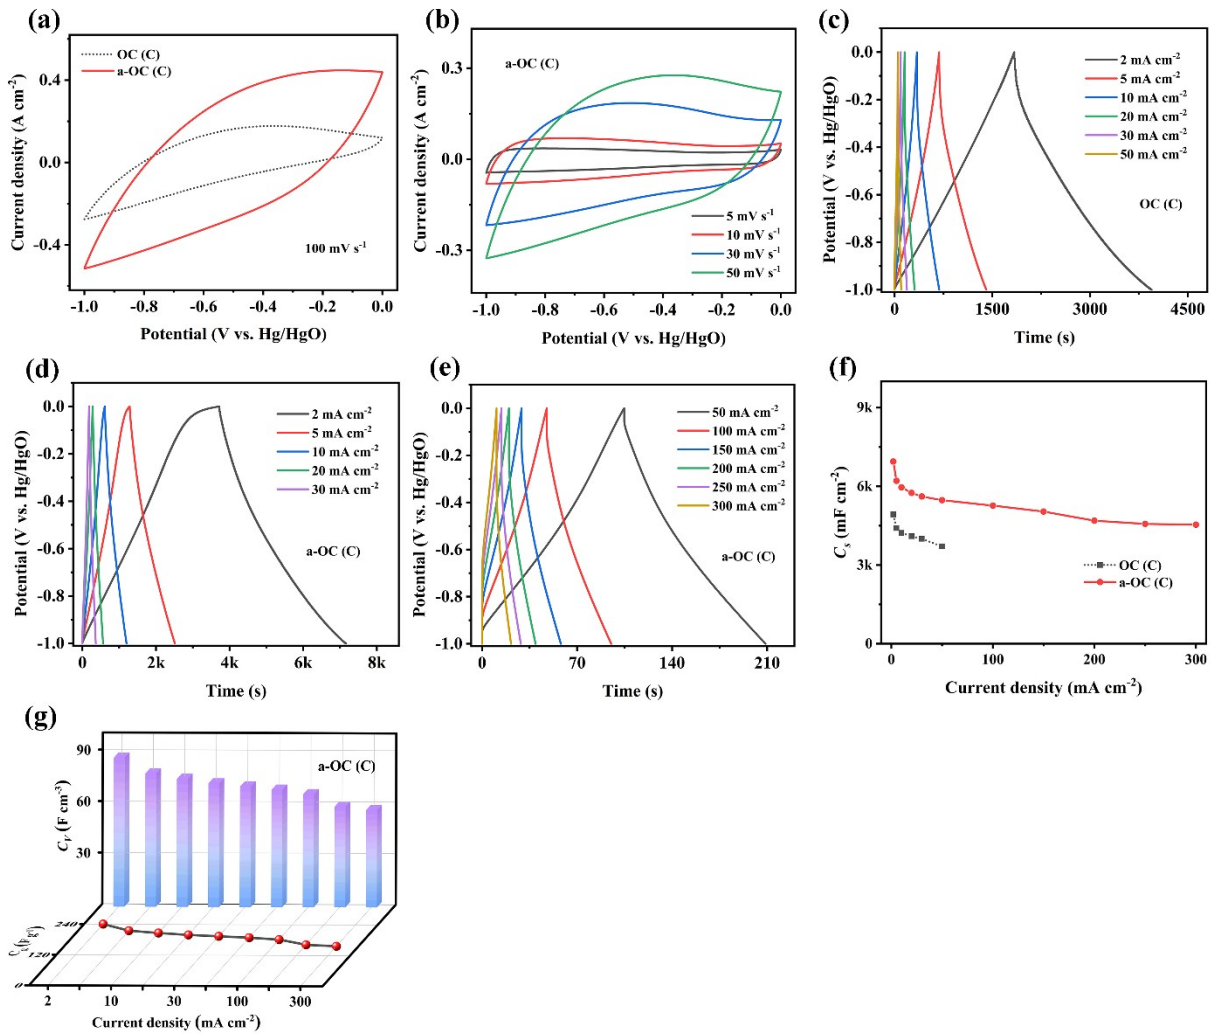

**Fig. S9.** Capacitive properties of electrodes in three-electrode system with 6 M KOH electrolyte. (a) The comparison of CV curves of OC (C) and a-OC (C) at 100 mV s<sup>-1</sup>. (b) CV curves of a-OC (C). GCD profiles of (c) OC (C) and (d, e) a-OC (C). (f) Rate performance of OC (C) and a-OC (C). (g) Comparison of C<sub>g</sub> and C<sub>V</sub> versus different current densities of a-OC (C).

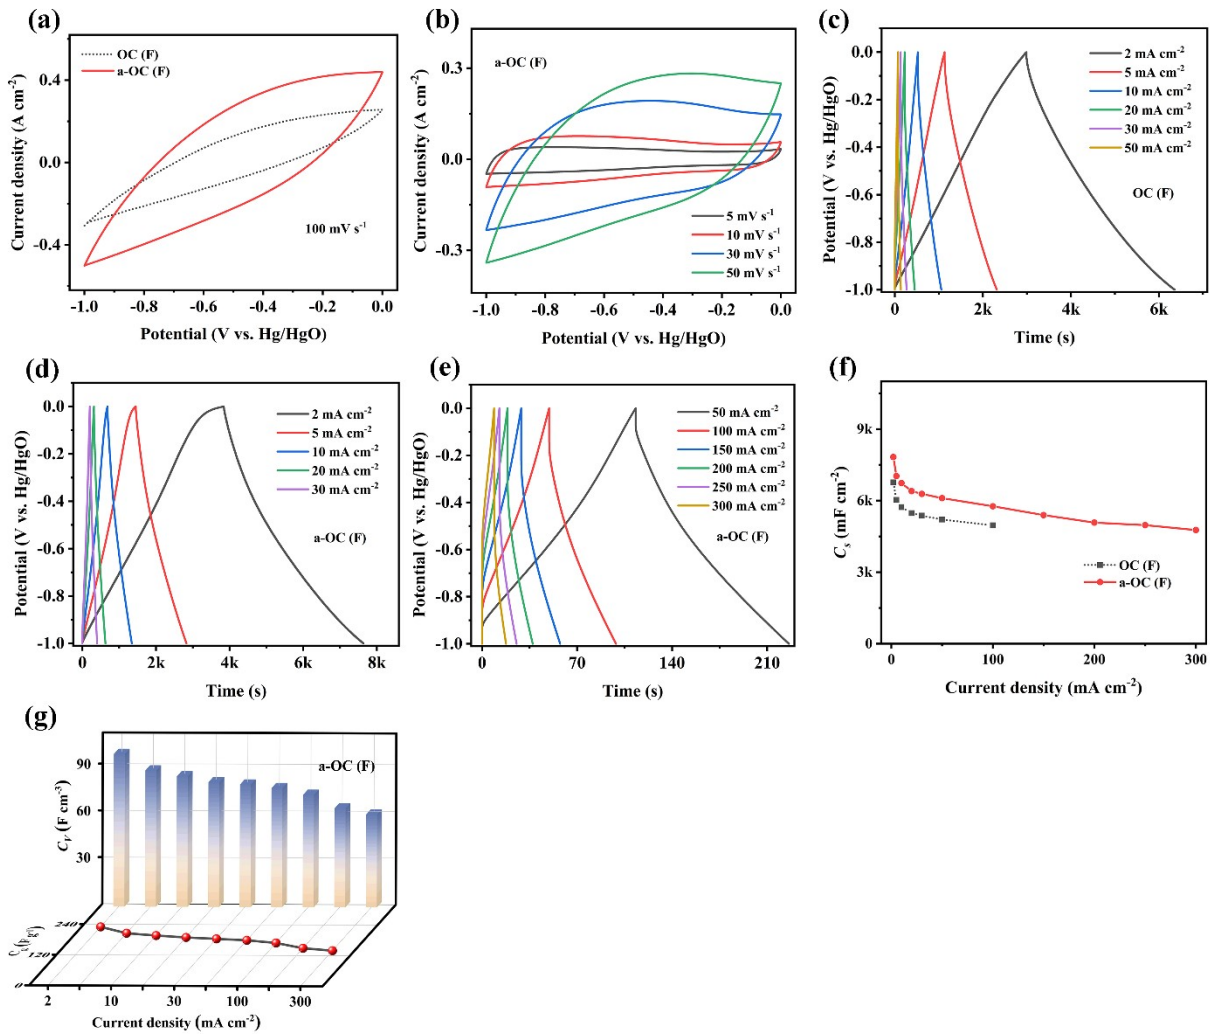

**Fig. S10.** Capacitive properties of electrodes in three-electrode system with 6 M KOH electrolyte. (a) The comparison of CV curves of OC (F) and a-OC (F) at 100 mV s<sup>-1</sup>. (b) CV curves of a-OC (F). GCD profiles of (c) OC (F) and (d, e) a-OC (F). (f) Rate performance of OC (F) and a-OC (F). (g) Comparison of C<sub>g</sub> and C<sub>v</sub> versus different current densities of a-OC (F).

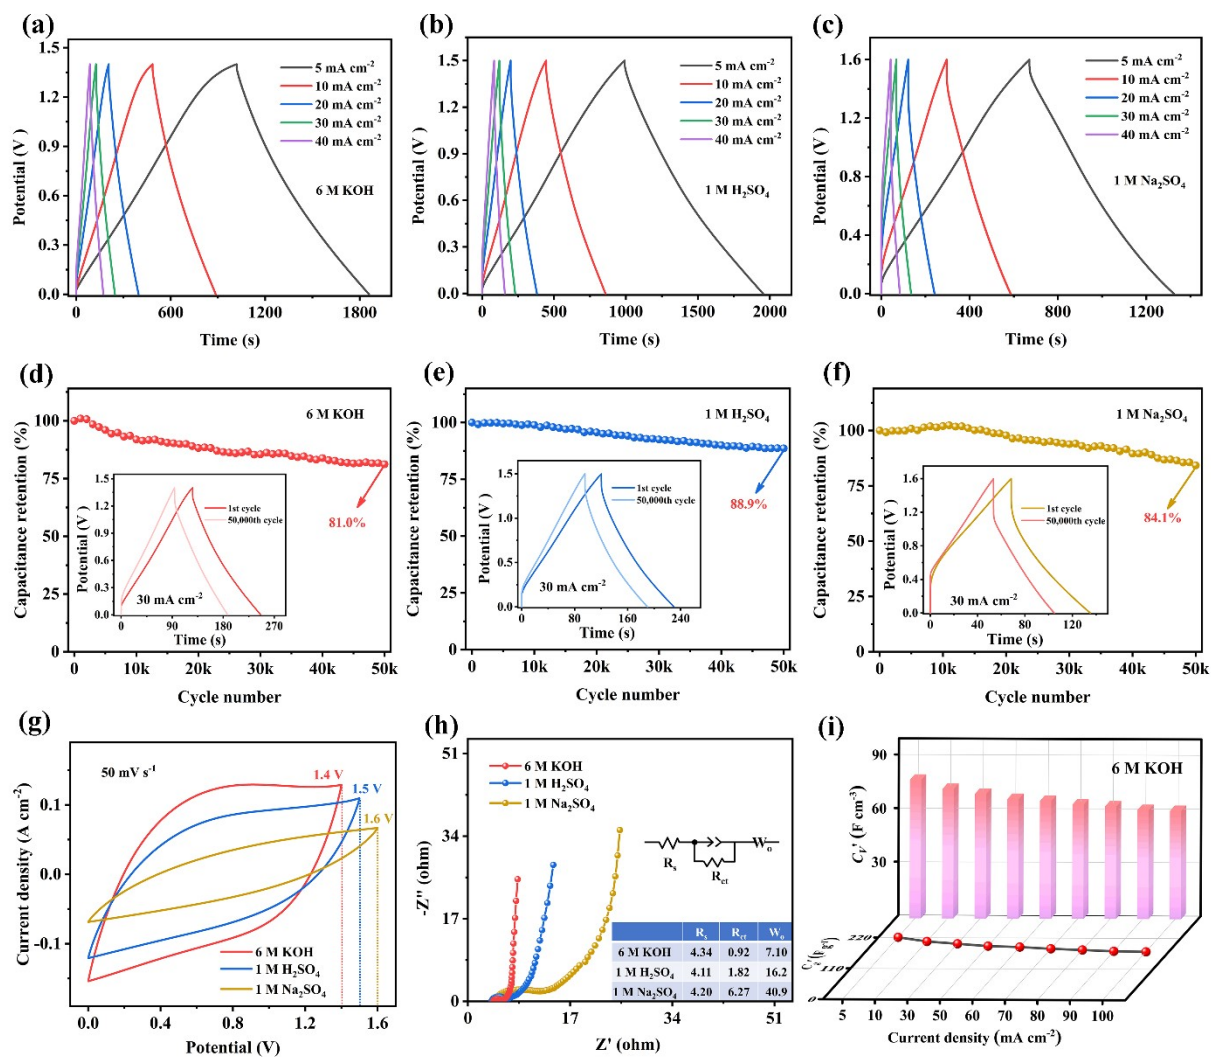

**Fig. S11.** The capacitive properties of symmetric supercapacitors (a-OC-900//a-OC-900) with 6 M KOH, 1 M H<sub>2</sub>SO<sub>4</sub>, and 1 M Na<sub>2</sub>SO<sub>4</sub> electrolyte, respectively. The GCD profiles of devices in (a) 6 M KOH, (b) 1 M H<sub>2</sub>SO<sub>4</sub>, and (c) 1 M Na<sub>2</sub>SO<sub>4</sub> electrolyte. The long cycle performance of devices in (d) 6 M KOH, (e) 1 M H<sub>2</sub>SO<sub>4</sub>, and (f) 1 M Na<sub>2</sub>SO<sub>4</sub> electrolyte. (g) The comparison of CV curves of devices in different electrolytes. (h) Nyquist plots of devices in different electrolytes, the inset is the corresponding equivalent circuit diagram and fitted values. (i) Comparison of C<sub>g</sub> and C<sub>V</sub> versus different current densities of devices in 6 M KOH.

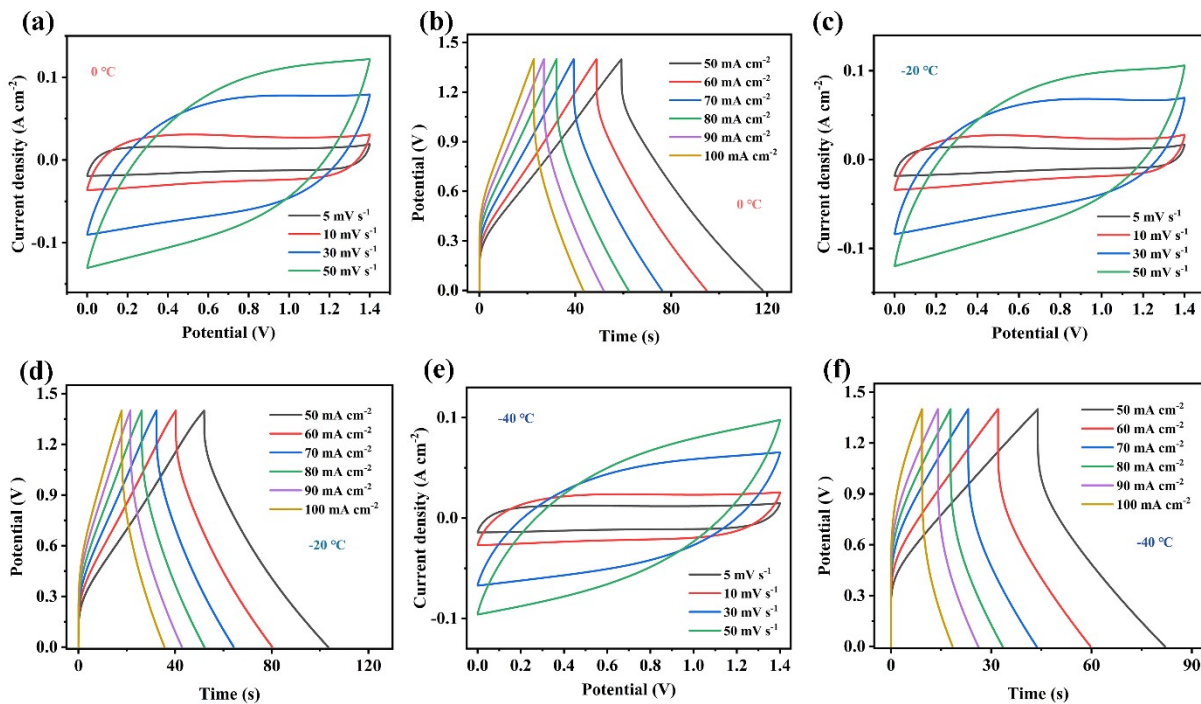

**Fig. S12.** The capacitive properties of symmetric supercapacitors (a-OC-900//a-OC-900) with 6 M KOH at different temperature. (a) CV curves and (b) GCD profiles of devices at 0 °C. (c) CV curves and (d) GCD profiles of devices at -20 °C. (e) CV curves and (f) GCD profiles of devices at -40 °C.

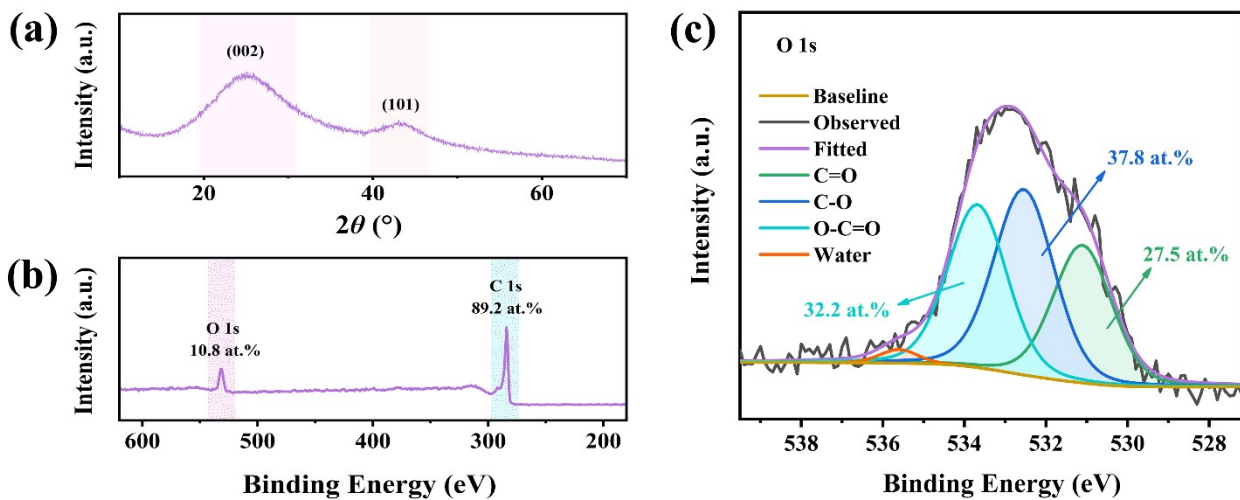

**Fig. S13.** (a) XRD pattern, (b) XPS survey spectrum, and (c) high-resolution O 1s spectra of the a-OC-900

electrode after 70,000 cycles at -40  $^\circ$ C.



**Table S1.** Porosity characteristics of OC-800, OC-900, OC-1000, a-OC-800, a-OC-900, a-OC-1000.

| Sample    | $S_{\text{BET}}$<br>( $\text{m}^2 \text{g}^{-1}$ ) | $S_{\text{mic}}$<br>( $\text{m}^2 \text{g}^{-1}$ ) | $V_{\text{t}}$<br>( $\text{cm}^3 \text{g}^{-1}$ ) | $V_{\text{mic}}$<br>( $\text{cm}^3 \text{g}^{-1}$ ) | $V_{\text{mic}}/V_{\text{t}}$<br>(%) | $D_{\text{ap}}$<br>(nm) |
|-----------|----------------------------------------------------|----------------------------------------------------|---------------------------------------------------|-----------------------------------------------------|--------------------------------------|-------------------------|
| OC-800    | 371.6                                              | 348.2                                              | 0.20                                              | 0.18                                                | 90                                   | 2.19                    |
| OC-900    | 300.2                                              | 282.3                                              | 0.17                                              | 0.15                                                | 88                                   | 1.59                    |
| OC-1000   | 204.8                                              | 200.5                                              | 0.13                                              | 0.12                                                | 92                                   | 1.09                    |
| a-OC-800  | 722.8                                              | 601.8                                              | 0.35                                              | 0.26                                                | 74                                   | 1.95                    |
| a-OC-900  | 612.6                                              | 552.4                                              | 0.30                                              | 0.21                                                | 70                                   | 1.89                    |
| a-OC-1000 | 532.4                                              | 487.2                                              | 0.25                                              | 0.22                                                | 88                                   | 1.86                    |

$S_{\text{BET}}$ , total specific surface area.

$S_{\text{mic}}$ , specific surface area of micropores.

$V_{\text{t}}$ , total pore volume.

$V_{\text{mic}}$ , micropore volume.

$D_{\text{ap}}$ , average pore diameter.

**Table S2.** Element analysis of OC-900 and a-OC-900

| Samples  | C (at.%) | O<br>(at.%) | O/C  | C 1s                 |                      |                      |                        |                                  | O 1s                 |                       |                        | Chemisorbed/<br>physisorbed<br>water |
|----------|----------|-------------|------|----------------------|----------------------|----------------------|------------------------|----------------------------------|----------------------|-----------------------|------------------------|--------------------------------------|
|          |          |             |      | C=C<br>(BE,<br>at.%) | C-O<br>(BE,<br>at.%) | C=O<br>(BE,<br>at.%) | O-C=O<br>(BE,<br>at.%) | $\pi$ - $\pi^*$<br>(BE,<br>at.%) | O-I<br>(BE,<br>at.%) | O-II<br>(BE,<br>at.%) | O-III<br>(BE,<br>at.%) |                                      |
| OC-900   | 95.5     | 4.5         | 0.05 | 284.8,<br>56.1       | 285.4,<br>22.8       | 286.6,<br>10.5       | 288.8,<br>8.3          | 291.0,<br>2.4                    | 530.6,<br>11.8       | 532.5,<br>67.9        | 534.3,<br>14.8         | 536.7,<br>6.1                        |
| a-OC-900 | 89.5     | 10.5        | 0.12 | 284.8,<br>62.0       | 285.8,<br>10.7       | 286.9,<br>15.9       | 289.0,<br>6.0          | 291.0,<br>5.4                    | 531.1,<br>32.7       | 532.7,<br>29.2        | 533.9,<br>32.1         | 535.9,<br>6.0                        |

BE: Binding energy, eV.

at.%: atomic content ratios.

**Table S3.** The comparison of a-OC-900 and other carbon-based electrodes with high mass loading (three-electrode system).

| Precursor            | Method                                   | Electrode mass loading; thickness    | Electrolyte                         | Initial capacitance                                                                                               | Rate performance                                                                                                   | Cycle durability                           | Ref.      |
|----------------------|------------------------------------------|--------------------------------------|-------------------------------------|-------------------------------------------------------------------------------------------------------------------|--------------------------------------------------------------------------------------------------------------------|--------------------------------------------|-----------|
| Basswood             | H <sub>2</sub> O <sub>2</sub> activation | ~40 mg cm <sup>-2</sup><br>~800 μm   | 6 M KOH                             | 9383.7 mF cm <sup>-2</sup> ,<br>330.2 F g <sup>-1</sup> ,<br>117.5 F cm <sup>-3</sup><br>at 2 mA cm <sup>-2</sup> | 5592.0 mF cm <sup>-2</sup> ,<br>200.1 F g <sup>-1</sup> ,<br>69.9 F cm <sup>-3</sup><br>at 300 mA cm <sup>-2</sup> | 96.8%<br>50,000<br>100 mA cm <sup>-2</sup> | This work |
| Peanut dregs         | KOH activation                           | 12.5 mg cm <sup>-2</sup><br>125 μm   | 6 M KOH                             | 4102 mF cm <sup>-2</sup> ,<br>328 F g <sup>-1</sup> ,<br>328 F cm <sup>-3</sup><br>at 10 mA cm <sup>-2</sup>      | 3484 mF cm <sup>-2</sup> ,<br>at 200 mA cm <sup>-2</sup>                                                           | 94%<br>20,000<br>20 mA g <sup>-1</sup>     | 2         |
| Basswood             | Phytic acid activation                   | 17.17 mg cm <sup>-2</sup><br>~800 μm | 6 M KOH                             | 6590 mF cm <sup>-2</sup> ,<br>384 F g <sup>-1</sup> ,<br>at 1 mA cm <sup>-2</sup>                                 | 4990 mF cm <sup>-2</sup> ,<br>285 F g <sup>-1</sup> ,<br>at 30 mA cm <sup>-2</sup>                                 | 90.5%<br>20,000<br>20 mA cm <sup>-2</sup>  | 3         |
| Basswood             | Enzymolysis-treated                      | ~25 mg cm <sup>-2</sup><br>~800 μm   | 6 M KOH                             | 8410 mF cm <sup>-2</sup> ,<br>328 F g <sup>-1</sup> ,<br>at 1 mA cm <sup>-2</sup>                                 | 3776 mF cm <sup>-2</sup> ,<br>146.9 F g <sup>-1</sup> ,<br>at 50 mA cm <sup>-2</sup>                               | 87%<br>15,000<br>50 mA cm <sup>-2</sup>    | 4         |
| Basswood             | CO <sub>2</sub> activation               | 30 mg cm <sup>-2</sup><br>1 mm       | 1 M Na <sub>2</sub> SO <sub>4</sub> | 3204 mF cm <sup>-2</sup> ,<br>118.7 F g <sup>-1</sup> ,<br>at 1 mA cm <sup>-2</sup>                               | 2800 mF cm <sup>-2</sup> ,<br>103.7 F g <sup>-1</sup> ,<br>at 30 mA cm <sup>-2</sup>                               | /                                          | 5         |
| Resin<br>3D printing | CO <sub>2</sub> activation               | 46.2 mg cm <sup>-2</sup><br>1.5 mm   | 1 M Na <sub>2</sub> SO <sub>4</sub> | 5251 mF cm <sup>-2</sup> ,<br>115 F g <sup>-1</sup> ,<br>at 3 mA cm <sup>-2</sup>                                 | 4273 mF cm <sup>-2</sup> ,<br>93.5 F g <sup>-1</sup> ,<br>at 30 mA cm <sup>-2</sup>                                | 91%<br>10,000<br>30 mA cm <sup>-2</sup>    | 6         |
| Basswood             | Delignification                          | 54.75 mg cm <sup>-2</sup><br>1.5 mm  | 6 M KOH                             | 7600 mF cm <sup>-2</sup> ,<br>130 F g <sup>-1</sup> ,<br>at 1 mA cm <sup>-2</sup>                                 | ~5000 mF cm <sup>-2</sup> ,<br>~80 F g <sup>-1</sup> ,<br>at 50 mA cm <sup>-2</sup>                                | /                                          | 7         |

**Table S4.** The comparison of a-OC-900//a-OC-900 and other carbon-based devices with high mass loading (two-electrode system).

| Precursor               | Method                                   | Electrode mass loading; thickness  | Electrolyte                        | Initial capacitance                                                                                              | Rate performance                                                                                                   | Cycle durability                           | Maximum energy density                                                                 | Maximum power density                                                                  | Ref.      |
|-------------------------|------------------------------------------|------------------------------------|------------------------------------|------------------------------------------------------------------------------------------------------------------|--------------------------------------------------------------------------------------------------------------------|--------------------------------------------|----------------------------------------------------------------------------------------|----------------------------------------------------------------------------------------|-----------|
| Basswood                | H <sub>2</sub> O <sub>2</sub> activation | ~40 mg cm <sup>-2</sup><br>~800 μm | 6 M KOH                            | 6205.7 mF cm <sup>-2</sup> ,<br>221.6 F g <sup>-1</sup> ,<br>77.6 F cm <sup>-3</sup><br>at 5 mA cm <sup>-2</sup> | 4849.5 mF cm <sup>-2</sup> ,<br>173.2 F g <sup>-1</sup> ,<br>60.6 F cm <sup>-3</sup><br>at 100 mA cm <sup>-2</sup> | 81%<br>50,000<br>30 mA cm <sup>-2</sup>    | 1.64 mWh cm <sup>-2</sup> ,<br>58.8 Wh kg <sup>-1</sup> ,<br>20.6 mWh cm <sup>-3</sup> | 110.2 mW cm <sup>-2</sup> ,<br>3915.7 W kg <sup>-1</sup><br>1370.3 mW cm <sup>-3</sup> | This work |
| Conductive carbon black | KOH, MgSO <sub>4</sub> activation        | 10 mg cm <sup>-2</sup><br>700 μm   | 6 M KOH                            | 1280 mF cm <sup>-2</sup> ,<br>111 F g <sup>-1</sup><br>16.1 F cm <sup>-3</sup><br>at 1 A g <sup>-1</sup>         | ~950 mF cm <sup>-2</sup> ,<br>95 F g <sup>-1</sup><br>at 10 A g <sup>-1</sup>                                      | 92.6%<br>10,000<br>2 A g <sup>-1</sup>     | /                                                                                      | /                                                                                      | 8         |
| Waste cotton            | KOH activation                           | 10 mg cm <sup>-2</sup><br>~150 μm  | 6 M KOH                            | 175 F g <sup>-1</sup> ,<br>129 F cm <sup>-3</sup> ,<br>at 0.5 A g <sup>-1</sup>                                  | 125 F g <sup>-1</sup> ,<br>100 F cm <sup>-3</sup> ,<br>at 10 A g <sup>-1</sup>                                     | ~90%<br>10,000<br>0.5 A g <sup>-1</sup>    | 6.2 Wh kg <sup>-1</sup> ,<br>4.97 mWh cm <sup>-3</sup>                                 | /                                                                                      | 9         |
| PAN<br>PMMA<br>GO       | layer-by-layer electrospinning           | 12 mg cm <sup>-2</sup><br>82 μm    | 1 M H <sub>2</sub> SO <sub>4</sub> | 1536 mF cm <sup>-2</sup> ,<br>103 F cm <sup>-3</sup><br>at 1 mA cm <sup>-2</sup>                                 | 1030 mF cm <sup>-2</sup> ,<br>69 F cm <sup>-3</sup><br>at 4 mA cm <sup>-2</sup>                                    | ~99.4%<br>20,000<br>10 mA cm <sup>-2</sup> | 0.22 mWh cm <sup>-2</sup> ,<br>14.3 mWh cm <sup>-3</sup>                               | 10.3 mW cm <sup>-2</sup>                                                               | 10        |
| Graphene                | Phytic acid activation                   | 12 mg cm <sup>-2</sup><br>~100 μm  | 6 M KOH                            | 1148.5 mF cm <sup>-2</sup> ,<br>57.4 F cm <sup>-3</sup><br>at 1 mA cm <sup>-2</sup>                              | 811 mF cm <sup>-2</sup> ,<br>40.5 F cm <sup>-3</sup><br>at 100 mA cm <sup>-2</sup>                                 | 89%<br>5,000<br>20 mA cm <sup>-2</sup>     | 7.9 mWh cm <sup>-3</sup>                                                               | 2500 mW cm <sup>-3</sup>                                                               | 11        |

| Precursor | Method                                   | Electrode mass loading; thickness    | Electrolyte                        | Initial capacitance                                                                                                                     | Rate performance                                                                                            | Cycle durability                           | Maximum energy density                                    | Maximum power density                                  | Ref. |
|-----------|------------------------------------------|--------------------------------------|------------------------------------|-----------------------------------------------------------------------------------------------------------------------------------------|-------------------------------------------------------------------------------------------------------------|--------------------------------------------|-----------------------------------------------------------|--------------------------------------------------------|------|
| Basswood  | Phytic acid activation                   | 17.17 mg cm <sup>-2</sup><br>~800 μm | 6 M KOH                            | 4700 mF cm <sup>-2</sup> ,<br>206.5 F g <sup>-1</sup> ,<br>29.3 F cm <sup>-3</sup><br>at 1 mA cm <sup>-2</sup>                          | 2900 mF cm <sup>-2</sup><br>106 F g <sup>-1</sup> ,<br>18.1 F cm <sup>-3</sup><br>at 20 mA cm <sup>-2</sup> | 90.5%<br>20,000<br>20 mA cm <sup>-2</sup>  | 0.94 mWh cm <sup>-2</sup> ,<br>41.2 Wh kg <sup>-1</sup> , | 14.4 mW cm <sup>-2</sup> ,<br>437.4 W kg <sup>-1</sup> | 3    |
| Basswood  | Enzymolysis-treated                      | ~25 mg cm <sup>-2</sup><br>~800 μm   | 6 M KOH                            | 1500 mF cm <sup>-2</sup> ,<br>79 F g <sup>-1</sup><br>at 1 mA cm <sup>-2</sup>                                                          | 570 mF cm <sup>-2</sup> ,<br>30 F g <sup>-1</sup><br>at 50 mA cm <sup>-2</sup>                              | 86.6%<br>15,000<br>20 mA cm <sup>-2</sup>  | 0.21 mWh cm <sup>-2</sup> ,<br>10.97 Wh kg <sup>-1</sup>  | 15.0 mW cm <sup>-2</sup><br>800 W kg <sup>-1</sup>     | 4    |
| rGO       | H <sub>2</sub> SO <sub>4</sub> treatment | 33 mg cm <sup>-2</sup><br>260 μm     | 1 M H <sub>2</sub> SO <sub>4</sub> | 5365 mF cm <sup>-2</sup> ,<br>203 F cm <sup>-3</sup><br>at 33 mA cm <sup>-2</sup><br>175 F g <sup>-1</sup> at<br>0.39 A g <sup>-1</sup> | > 125 F g <sup>-1</sup> at<br>70 mA cm <sup>-2</sup>                                                        | ~99%<br>10,000                             | /                                                         | /                                                      | 12   |
| Basswood  | Delignification                          | ~55 mg cm <sup>-2</sup><br>1.5 mm    | 6 M KOH                            | 846 mF cm <sup>-2</sup> ,<br>65 F g <sup>-1</sup><br>2.6 F cm <sup>-3</sup><br>at 1 mA cm <sup>-2</sup>                                 | 160 mF cm <sup>-2</sup> ,<br>20 F g <sup>-1</sup><br>at 20 mA cm <sup>-2</sup>                              | 81.48%<br>15,000<br>20 mA cm <sup>-2</sup> | 9.04 Wh kg <sup>-1</sup>                                  | 2.39 W kg <sup>-1</sup> ,                              | 7    |

## References

1. V. Augustyn, P. Simon and B. Dunn, Pseudocapacitive oxide materials for high-rate electrochemical energy storage, *Energy Environ. Sci.*, 2014, **7**, 1597.
2. G. Yuan, Y. Liang, H. Hu, H. Li, Y. Xiao, H. Dong, Y. Liu and M. Zheng, Extraordinary thickness-independent electrochemical energy storage enabled by cross-linked microporous carbon nanosheets, *ACS Appl. Mater. Interfaces*, 2019, **11**, 26946-26955.
3. F. Wang, J. Y. Cheong, Q. He, G. Duan, S. He, L. Zhang, Y. Zhao, I.-D. Kim and S. Jiang, Phosphorus-doped thick carbon electrode for high-energy density and long-life supercapacitors, *Chem. Eng. J.*, 2021, **414**, 128767.
4. F. Wang, J. Y. Cheong, J. Lee, J. Ahn, G. Duan, H. Chen, Q. Zhang, I. D. Kim and S. Jiang, Pyrolysis of enzymolysis-treated wood: Hierarchically assembled porous carbon electrode for advanced energy storage devices, *Adv. Funct. Mater.*, 2021, **31**, 2101077.
5. C. j. Chen, Y. Zhang, Y. Li, J. q. Dai, J. w. Song, Y. g. Yao, Y. h. Gong, I. Kierzewski, J. Xie and L. b. Hu, All-wood, low tortuosity, aqueous, biodegradable supercapacitors with ultra-high capacitance, *Energy Environ. Sci.*, 2017, **10**, 538-545.
6. Y. Katsuyama, N. Haba, H. Kobayashi, K. Iwase, A. Kudo, I. Honma and R. B. Kaner, Macro- and nano-porous 3D-hierarchical carbon lattices for extraordinarily high capacitance supercapacitors, *Adv. Funct. Mater.*, 2022, DOI: 10.1002/adfm.202201544, 2201544.
7. F. Wang, L. Zhang, Q. Zhang, J. Yang, G. Duan, W. Xu, F. Yang and S. Jiang, Electrode thickness design toward bulk energy storage devices with high areal/volumetric energy density, *Appl. Energy*, 2021, **289**, 116734.
8. X. Ma, X. Song, Z. Yu, S. Li, X. Wang, L. Zhao, L. Zhao, Z. Xiao, C. Qi, G. Ning and J. Gao, S-doping coupled with pore-structure modulation to conducting carbon black: Toward high mass loading electrical double-layer capacitor, *Carbon*, 2019, **149**, 646-654.
9. M. Vijayakumar, R. Santhosh, J. Adduru, T. N. Rao and M. Karthik, Activated carbon fibres as high performance supercapacitor electrodes with commercial level mass loading, *Carbon*, 2018, **140**, 465-476.
10. R. Zhang, J. Yan, L. Wang, W. Shen, J. Zhang, M. Zhong and S. Guo, Achieving ion accessibility within graphene films by carbon nanofiber intercalation for high mass loading electrodes in supercapacitors, *J. Power Sources*, 2021, **513**, 230559.
11. Z. Song, W. Li, Y. Bao, Z. Sun, L. Gao, M. H. Nawaz, D. Han and L. Niu, A new route to tailor high mass loading all-solid-state supercapacitor with ultra-high volumetric energy density, *Carbon*, 2018, **136**, 46-53.
12. M. Zhang, X. Yu, H. Ma, W. Du, L. Qu, C. Li and G. Shi, Robust graphene composite films for multifunctional electrochemical capacitors with an ultrawide range of areal mass loading toward high-rate frequency response and ultrahigh specific capacitance, *Energy Environ. Sci.*, 2018, **11**, 559-565.
